# Supplementary material for: Hand eczema symptoms, exposures and skin care in orthodontics
Source: Springer Nature journal article supplement (doi:10.1007/s00056-024-00524-3), 2024-04-03
Supplement: MOESM1 [file 26938506]

# MUSTER

|        |                    |                                                                                     |
|--------|--------------------|-------------------------------------------------------------------------------------|
| evasys | KFO Allergologie   |  |
| DGAKI  | KFO - Allergologie | :UMG                                                                                |

Bitte so markieren:      Bitte verwenden Sie einen Kugelschreiber oder nicht zu starken Filzstift. Dieser Fragebogen wird maschinell erfasst.  
Korrektur:      Bitte beachten Sie im Interesse einer optimalen Datenerfassung die links gegebenen Hinweise beim Ausfüllen.

## Einwilligungserklärung

Ich habe den Text der Teilnehmerinformation gelesen und hatte ausreichend Zeit, mich zu entscheiden. Ich erkläre mich damit verstanden, dass meine Daten aus diesem Fragebogen in **anonymer Form** gespeichert und ausgewertet werden. Anonym bedeutet, dass die Daten nicht meiner Person zugeordnet werden können. Die anonymen Daten werden ausgewertet durch die Mitarbeiter/innen der Arbeitsgruppe von Herrn Prof. Dr. Timo Buhl von der Universitätsmedizin Göttingen sowie Herrn Prof. Dr. Thomas Werfel, Medizinische Hochschule Hannover.  
**Ich erkläre mich bereit, freiwillig an dieser Studie teilzunehmen.**

Ja  Nein

## Allgemeine Informationen

Welchen Beruf üben Sie aus?  Zahnärztin / Zahnarzt  Zahnmedizinische/r Fachangestellte/r  Sonstige

In welchem Beschäftigungsverhältnis arbeiten Sie?  Vollzeit (38h oder mehr)  Teilzeit oder stundenweise  Auszubildende/r  Praktikant/in

Wie viel Prozent Ihrer Arbeit verbringen Sie mit Büro- und medizinischen Tätigkeiten?  nur Büro                nur medizinische Tätigkeit

Seit wie vielen Jahren arbeiten Sie in Ihrem jetzigen Beruf? (keine Angabe gewünscht: Eingabe: NA)

Gehen Sie einer Nebentätigkeit nach?  Nein  Ja, folgende:

Geschlecht  Weiblich  Männlich  Divers  Keine Angabe

Wie alt sind Sie? (keine Angabe gewünscht: Eingabe: NA)

Rauchen Sie oder haben Sie früher einmal geraucht?  Ja, aktuell  Früher, in den letzten 10 Jahren aufgehört  Früher, seit über 10 Jahren nicht mehr  Nein, nie  Keine Angabe

# MUSTER

evasys

KFO Allergologie

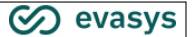

## Allgemeine Informationen [Fortsetzung]

Neigen Sie zu trockener Haut?  Ja, sehr  Ja, etwas  Nein  
 Weiß nicht

Bestehen außerberufliche Hautbelastungen (Gartenarbeit, Hausbau,-renovierung, Pflege Angehöriger, hautbelastende Hobbies, z.B. Töpfern)  Nein  Ja, folgende:

## Fragen zum aktuellen Hautzustand

Hatten Sie jemals einen juckenden Ausschlag, der über mindestens 6 Monate immer wieder auftritt und irgendwann auch die nachfolgenden Hautareale betroffen hat: Beuge der Ellenbogen, Kniekehle, an der Vorderseite der Knöchel, unterhalb vom Gesäß, um den Hals, an den Ohren oder um die Augen?  Nein  Ja

Hatten Sie jemals Heuschnupfen (Nasenlaufen, Niesen, Augentränen) oder Asthma nach Kontakt mit Allergenen (z.B. Baumpollen, Tierhaare, Gräser, Hausstaubmilben)?  Nein  Ja, folgende:

Bekommen sie Ausschlag von Metallknöpfen, Schmuck wie Ohrringen, Uhren oder vergleichbaren Metallgegenständen?  Nein  Ja

Wurden bei Ihnen jemals ein Handekzem ärztlich diagnostiziert und falls ja, wie stark war dieses ausgeprägt?  Ja, stark  Ja, mittel  Ja, mild  
 Nein  Weiß nicht

Betraff das Ekzem auch Handgelenke und/oder Unterarme?  Nein  Ja

Wann hatten sie das Ekzem?  Aktuell  früher, in den letzten 3 Monaten  früher, in den letzten 3-12 Monaten  
 früher, vor mehr als 12 Monaten

Liegen/lagen bei Ihnen in den letzten 12 Monaten folgende Hautveränderungen bzw. Symptome an den Händen und/oder Fingern vor?

Trockene Stellen und Rötungen im Bereich der Fingerzwischenräume  Nein  Leicht  Mäßig  
 Schwer

Schuppung  Nein  Leicht  Mäßig  
 Schwer

Rötung  Nein  Leicht  Mäßig  
 Schwer



## Fragen zur Hautbelastung [Fortsetzung]

Welche Materialien/Chemikalien/Faktoren sind das bei der Arbeit?

- |                                              |                                                                        |                                                                 |
|----------------------------------------------|------------------------------------------------------------------------|-----------------------------------------------------------------|
| <input type="checkbox"/> Handschuhe          | <input type="checkbox"/> Reinigungsmittel, inkl. Waschmittel und Seife | <input type="checkbox"/> Lösungsmittel                          |
| <input type="checkbox"/> Desinfektionsmittel | <input type="checkbox"/> häufiges Händewaschen                         | <input type="checkbox"/> Arbeit mit feuchten oder nassen Händen |
| <input type="checkbox"/> Stress              | <input type="checkbox"/> Nahrungsmittel/-zubereitung                   | <input type="checkbox"/> Öle                                    |
| <input type="checkbox"/> Farben              | <input type="checkbox"/> Kleber                                        | <input type="checkbox"/> Staub                                  |
| <input type="checkbox"/> Abfall, Müll        | <input type="checkbox"/> Weiteres:                                     |                                                                 |

Welche Materialien/Chemikalien/Faktoren sind das in der Freizeit?

- |                                              |                                                                        |                                                                 |
|----------------------------------------------|------------------------------------------------------------------------|-----------------------------------------------------------------|
| <input type="checkbox"/> Handschuhe          | <input type="checkbox"/> Reinigungsmittel, inkl. Waschmittel und Seife | <input type="checkbox"/> Lösungsmittel                          |
| <input type="checkbox"/> Desinfektionsmittel | <input type="checkbox"/> häufiges Händewaschen                         | <input type="checkbox"/> Arbeit mit feuchten oder nassen Händen |
| <input type="checkbox"/> Stress              | <input type="checkbox"/> Nahrungsmittel/-zubereitung                   | <input type="checkbox"/> Öle                                    |
| <input type="checkbox"/> Farben              | <input type="checkbox"/> Kleber                                        | <input type="checkbox"/> Staub                                  |
| <input type="checkbox"/> Abfall, Müll        | <input type="checkbox"/> Weiteres:                                     |                                                                 |

Wie viele **Stunden** nach Kontakt werden die Hautveränderungen üblicherweise schlimmer?  
(keine Angabe gewünscht: Eingabe: NA)

Wie viele Stunden pro Tag tragen Sie Handschuhe bei der **Arbeit**?  
(keine Angabe gewünscht: Eingabe: NA)

Welche Art Handschuhe nutzen Sie bei der Arbeit?

- |                                                             |                                                                                |                                                        |
|-------------------------------------------------------------|--------------------------------------------------------------------------------|--------------------------------------------------------|
| <input type="checkbox"/> Latex/natürliche Gummiverbindungen | <input type="checkbox"/> synthetische Gummiverbindungen (u.a. Nitril, Neopren) | <input type="checkbox"/> Plastik (u.a. PVC bzw. Vinyl) |
| <input type="checkbox"/> Leder                              | <input type="checkbox"/> Andere                                                | <input type="checkbox"/> Weiß nicht                    |

Wie viel Mal waschen Sie die Hände **pro Arbeitstag**?  
(keine Angabe gewünscht: Eingabe: NA)

## Fragen zur Hautbelastung [Fortsetzung]

Wie viel Mal desinfizieren Sie die Hände **pro Arbeitstag**?  
(keine Angabe gewünscht: Eingabe: NA)

An wie vielen Monaten in den letzten 12 Monaten konnten Sie aufgrund der Hautprobleme an den Händen nicht erwerbstätig sein?  
(keine Angabe gewünscht: Eingabe: NA)

## Fragen zum Hautschutz

Kennen Sie den Unterschied zwischen Hautschutz- und Hautpflegecreme?

Ja  Nein  Keine Angabe

Verwenden Sie Hautschutzcreme und/oder Hautpflegecreme?

Hautschutzcreme  Hautpflegecreme  Beides  
 Nein

An wie vielen Tagen in der Woche verwenden Sie eine Hautschutzcreme?

An keinem Tag  An 1-2 Tagen  An 3-4 Tagen  
 An 5-6 Tagen  An jedem Tag

Wenn mind 1-2/Tag: Wann wenden Sie die Hautschutzcreme an? (Mehrfachauswahl)

Vor Arbeitsbeginn  Vor hautbelastenden Tätigkeiten  Nach dem Händewaschen  
 Nach der Arbeit

An wie vielen Tagen in der Woche verwenden Sie eine Hautpflegecreme?

An keinem Tag  An 1-2 Tagen  An 3-4 Tagen  
 An 5-6 Tagen  An jedem Tag

Wenn mind 1-2/Tag: Wann wenden Sie die Hautpflegecreme an? (Mehrfachauswahl)

Vor Arbeitsbeginn  Vor hautbelastenden Tätigkeiten  Nach dem Händewaschen  
 Nach der Arbeit

Gibt es an ihrer Arbeitsstelle betriebliche Präventionsschulungen oder sonstige strukturierte Maßnahmen zur Prävention von berufsbedingten Hauterkrankungen?

Ja, regelmäßig  Ja, ab und zu  Nein

## Eigene Einschätzung

Verschlechtert sich der Hautzustand Ihrer Hände durch die Tätigkeit?

Nein  Ja, folgende:

Werden Ihre Hautveränderungen während des Urlaubs besser?

Überhaupt nicht  Leicht  Mäßig  
 Deutlich

Wie stark haben Ihre Hautveränderungen bzw. Symptome Ihre **Arbeit** in den letzten 12 Monaten beeinträchtigt?

0                 10  
(überhaupt nicht beeinflusst) (extrem beeinflusst)  keine Angabe

## Eigene Einschätzung [Fortsetzung]

Wie stark haben Ihre Hautveränderungen bzw. Symptome Ihren **Haushalt** in den letzten 12 Monaten beeinträchtigt? 0  10 (extrem beeinflusst)  keine Angabe  
(überhaupt nicht beeinflusst)

Wie stark haben Ihre Hautveränderungen bzw. Symptome Ihren **Sport** in den letzten 12 Monaten beeinträchtigt? 0  10 (extrem beeinflusst)  keine Angabe  
(überhaupt nicht beeinflusst)

Wie stark haben Ihre Hautveränderungen bzw. Symptome Ihre **Freizeit** (außer Sport) in den letzten 12 Monaten beeinträchtigt? 0  10 (extrem beeinflusst)  keine Angabe  
(überhaupt nicht beeinflusst)

**Welche Fragen stellen Sie sich bezüglich beruflicher Hauterkrankungen und Hautschutz? Welche Themengebiete interessieren Sie?** *[Wir würden uns über eine Antwort und die damit verbundene Anregung sehr freuen!]*
