# Supplementary material for: Hand eczema symptoms, exposures and skin care in orthodontics
Source: Springer Nature journal article supplement (doi:10.1007/s00056-024-00524-3), 2024-04-03
Supplement: MOESM2 [file 26938506]

|                                                        |                  |
|--------------------------------------------------------|------------------|
| Skin experienced stress outside primary occupation (%) | n = 207, (100%)  |
| No                                                     | 148 (71.5%)      |
| Yes                                                    | 59 (28.5%)       |
| History of rhinitis or asthma                          | n = 208, (99.5%) |
| No                                                     | 116 (55.8%)      |
| Yes                                                    | 92 (44.2%)       |
| ↳ Time of eczema diagnosis                             | n = 45, (21.5%)  |
| More than 12 months ago                                | 26 (57.8%)       |
| In the last 3 months                                   | 2 (4.4%)         |
| In the last 3-12 months                                | 5 (11.1%)        |
| Current                                                | 12 (26.7%)       |

**Supplementary Table 1: Eczema-focused medical history.** Percentages of responses to questions summarized in headings are highlighted in grey in relation to the overall respondents and the corresponding subgroups (n)

|                                                             |                  |
|-------------------------------------------------------------|------------------|
| Seasonal dependency                                         | n = 209, (100%)  |
| No                                                          | 159 (76.1%)      |
| Yes                                                         | 50 (23.9%)       |
| Exacerbation in spring                                      | n = 209, (100%)  |
| No                                                          | 196 (93.8%)      |
| Yes                                                         | 13 (6.2%)        |
| Exacerbation in summer                                      | n = 209, (100%)  |
| No                                                          | 200 (95.7%)      |
| Yes                                                         | 9 (4.3%)         |
| Exacerbation in autumn                                      | n = 209, (100%)  |
| No                                                          | 187 (89.5%)      |
| Yes                                                         | 22 (10.5%)       |
| Exacerbation through materials, chemicals, or other factors | n = 196, (93.8%) |
| No                                                          | 99 (50.5%)       |
| Unclear                                                     | 23 (11.7%)       |
| Yes                                                         | 74 (37.8%)       |
| ↳ Exacerbation through gloves at work                       | n = 110, (52.6%) |
| No                                                          | 69 (62.7%)       |
| Yes                                                         | 41 (37.3%)       |
| ↳ Exacerbation through detergents at work                   | n = 110, (52.6%) |
| No                                                          | 59 (53.6%)       |
| Yes                                                         | 51 (46.4%)       |
| ↳ Exacerbation through solvents at work                     | n = 110, (52.6%) |
| No                                                          | 93 (84.5%)       |
| Yes                                                         | 17 (15.5%)       |
| ↳ Exacerbation through disinfectants at work                | n = 110, (52.6%) |
| No                                                          | 45 (40.9%)       |
| Yes                                                         | 65 (59.1%)       |
| ↳ Exacerbation through frequent hand washing at work        | n = 110, (52.6%) |
| No                                                          | 41 (37.3%)       |
| Yes                                                         | 69 (62.7%)       |
| ↳ Exacerbation through work with moist or wet hands at work | n = 110, (52.6%) |
| No                                                          | 75 (68.2%)       |
| Yes                                                         | 35 (31.8%)       |
| ↳ Exacerbation through stress at work                       | n = 110, (52.6%) |
| No                                                          | 78 (70.9%)       |
| Yes                                                         | 32 (29.1%)       |

|                                                                         |                  |
|-------------------------------------------------------------------------|------------------|
| ↳ Exacerbation through food preparation at work                         | n = 110, (52.6%) |
| No                                                                      | 109 (99.1%)      |
| Yes                                                                     | 1 (0.9%)         |
| ↳ Exacerbation through oils at work                                     | n = 110, (52.6%) |
| No                                                                      | 110 (100%)       |
| Yes                                                                     | 0 (0.0%)         |
| ↳ Exacerbation through paints at work                                   | n = 110, (52.6%) |
| No                                                                      | 108 (98.2%)      |
| Yes                                                                     | 2 (1.8%)         |
| ↳ Exacerbation through adhesives at work                                | n = 110, (52.6%) |
| No                                                                      | 102 (92.7%)      |
| Yes                                                                     | 8 (7.3%)         |
| ↳ Exacerbation through dust at work                                     | n = 110, (52.6%) |
| No                                                                      | 100 (90.9%)      |
| Yes                                                                     | 10 (9.1%)        |
| ↳ Exacerbation through waste or garbage at work                         | n = 110, (52.6%) |
| No                                                                      | 108 (98.2%)      |
| Yes                                                                     | 2 (1.8%)         |
| ↳ Exacerbation through other factors at work                            | n = 110, (52.6%) |
| No                                                                      | 99 (90.0%)       |
| Yes                                                                     | 11 (10.0%)       |
| ↳ Exacerbation through gloves during leisure time                       | n = 110, (52.6%) |
| No                                                                      | 108 (98.2%)      |
| Yes                                                                     | 2 (1.8%)         |
| ↳ Exacerbation through detergents during leisure time                   | n = 110, (52.6%) |
| No                                                                      | 64 (58.2%)       |
| Yes                                                                     | 46 (41.8%)       |
| ↳ Exacerbation through solvents during leisure time                     | n = 110, (52.6%) |
| No                                                                      | 101 (91.8%)      |
| Yes                                                                     | 9 (8.2%)         |
| ↳ Exacerbation through disinfectants during leisure time                | n = 110, (52.6%) |
| No                                                                      | 90 (81.8%)       |
| Yes                                                                     | 20 (18.2%)       |
| ↳ Exacerbation through frequent hand washing during leisure time        | n = 110, (52.6%) |
| No                                                                      | 63 (57.3%)       |
| Yes                                                                     | 47 (42.7%)       |
| ↳ Exacerbation through work with moist or wet hands during leisure time | n = 110, (52.6%) |

|                                                             |                  |
|-------------------------------------------------------------|------------------|
| No                                                          | 84 (76.4%)       |
| Yes                                                         | 26 (23.6%)       |
| ↳ Exacerbation through stress during leisure time           | n = 110, (52.6%) |
| No                                                          | 91 (82.7%)       |
| Yes                                                         | 19 (17.3%)       |
| ↳ Exacerbation through food preparation during leisure time | n = 110, (52.6%) |
| No                                                          | 102 (92.7%)      |
| Yes                                                         | 8 (7.3%)         |
| ↳ Exacerbation through oils during leisure time             | n = 110, (52.6%) |
| No                                                          | 108 (98.2%)      |
| Yes                                                         | 2 (1.8%)         |
| ↳ Exacerbation through paints during leisure time           | n = 110, (52.6%) |
| No                                                          | 107 (97.3%)      |
| Yes                                                         | 3 (2.7%)         |
| ↳ Exacerbation through glue during leisure time             | n = 110, (52.6%) |
| No                                                          | 108 (98.2%)      |
| Yes                                                         | 2 (1.8%)         |
| ↳ Exacerbation through dust during leisure time             | n = 110, (52.6%) |
| No                                                          | 101 (91.8%)      |
| Yes                                                         | 9 (8.2%)         |
| ↳ Exacerbation through waste or garbage during leisure time | n = 110, (52.6%) |
| No                                                          | 106 (96.4%)      |
| Yes                                                         | 4 (3.6%)         |
| ↳ Exacerbation through other factors during leisure time    | n = 110, (52.6%) |
| No                                                          | 104 (94.5%)      |
| Yes                                                         | 6 (5.5%)         |
| ↳ Time lapse until exacerbation after contact (hours)       | n = 39, (18.7%)  |
| Mean (SD)                                                   | 3.0 (4.2)        |
| Median (IQR)                                                | 1.0 (2.0)        |

**Supplementary Table 2: Exacerbation factors.** Percentages of responses to questions summarized in headings are highlighted in grey in relation to the overall respondents and the corresponding subgroups (n). (↳) indicates the proportion for the grey highlighted topic of the previously mentioned corresponding subgroup

|                                           |                             |
|-------------------------------------------|-----------------------------|
| Material of work gloves                   | (multiple answers possible) |
| Latex, natural rubber                     | 91 (43.5%)                  |
| Synthetic rubber                          | 134 (64.1%)                 |
| Plastic                                   | 7 (3.3%)                    |
| Leather                                   | 1 (0.5%)                    |
| Unknown material                          | 1 (0.5%)                    |
| Skin problems affect work [NRS10]         | n = 186, (89.0%)            |
| Mean (SD)                                 | 1.1 (2.0)                   |
| Median (IQR)                              | 0 (2.0)                     |
| Skin problems affect household [NRS10]    | n = 183, (87.6%)            |
| Mean (SD)                                 | 1.1 (1.8)                   |
| Median (IQR)                              | 0 (2.0)                     |
| Skin problems affect sports [NRS10]       | n = 183, (87.6%)            |
| Mean (SD)                                 | 0.5 (1.3)                   |
| Median (IQR)                              | 0.0 (0.0)                   |
| Skin problems affect leisure time [NRS10] | n = 181, (86.6%)            |
| Mean (SD)                                 | 0.6 (1.4)                   |
| Median (IQR)                              | 0.0 (1.0)                   |

**Supplementary Table 3: Workplace factors and impairment in daily activities.**

Percentages of responses to questions summarized in headings are highlighted in grey in relation to the overall respondents and the corresponding subgroups (n)
